# Supplementary material for: Efficient encapsulation of CsPbBr3and Au nanocrystals in mesoporous metal–organic frameworks towards synergetic photocatalytic CO2reduction
Source: Royal Society of Chemistry journal article supplement (doi:10.1039/d2ta06561d), 2022-01-01
Supplement: d2ta06561d1.pdf [file d2ta06561d1.pdf]

## Supplementary Information

# **Efficient Encapsulation of CsPbBr<sub>3</sub> and Au nanocrystals in Mesoporous Metal–Organic Frameworks Towards Synergetic Photocatalytic CO<sub>2</sub> Reduction**

*Jia-Nan Huang, Yu-Jie Dong, Hai-Bing Zhao, Hong-Yan Chen\*, Dai-Bin Kuang and Cheng-Yong Su\**

MOE Key Laboratory of Bioinorganic and Synthetic Chemistry, Lehn Institute of Functional Materials, School of Chemistry, Sun Yat-sen University, Guangzhou 510006, P. R. China.

E-mail: [chenhy33@mail.sysu.edu.cn](mailto:chenhy33@mail.sysu.edu.cn); [cesscy@mail.sysu.edu.cn](mailto:cesscy@mail.sysu.edu.cn)

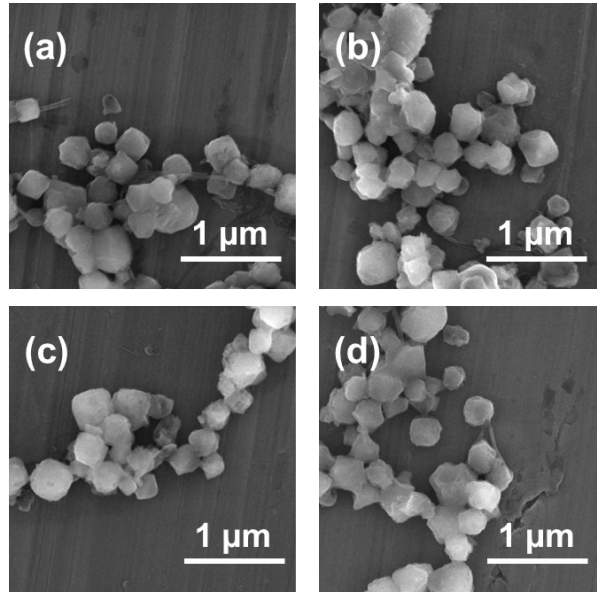

**Figure S1.** SEM image of (a) PCN-333(AI), (b) Au/PCN-333(AI), (c) CsPbBr<sub>3</sub>/PCN-333(AI) and (d) CsPbBr<sub>3</sub>/Au/PCN-333(AI).

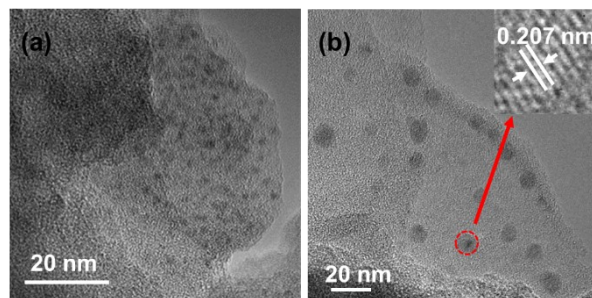

**Figure S2.** (a) TEM image of Au/PCN-333(AI). (b) TEM image of CsPbBr<sub>3</sub>/PCN-333(AI).

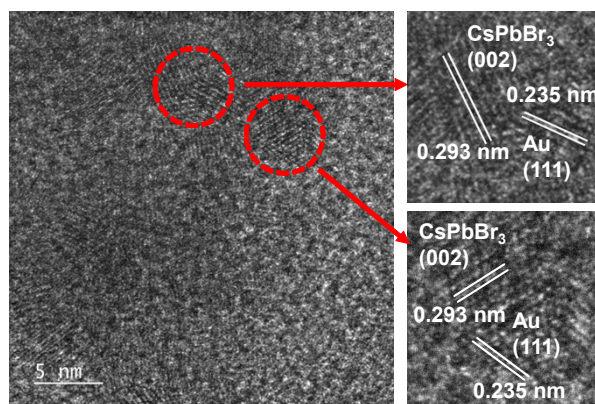

**Figure S3.** High resolution ultrathin section TEM image of CsPbBr<sub>3</sub>/Au/PCN-333(AI).

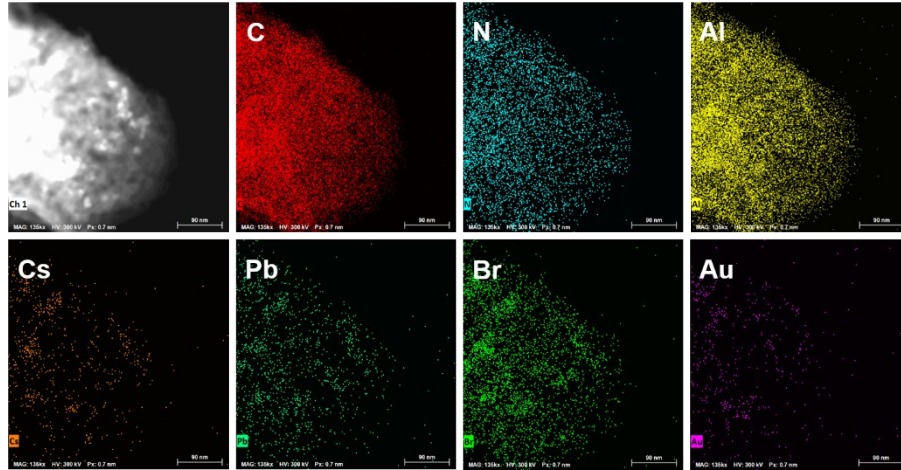

**Figure S4.** The elemental mapping images of CsPbBr<sub>3</sub>/Au/PCN-333(Al).

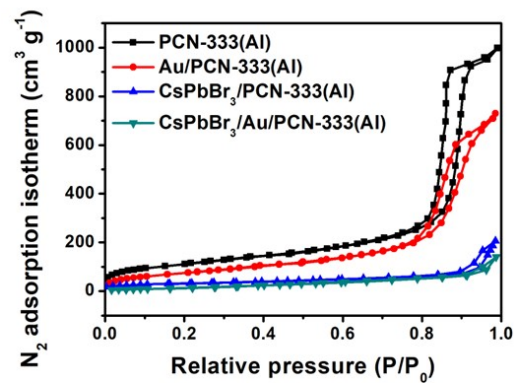

**Figure S5.** N<sub>2</sub> sorption isotherms of different samples at 77 K and 1 atm.

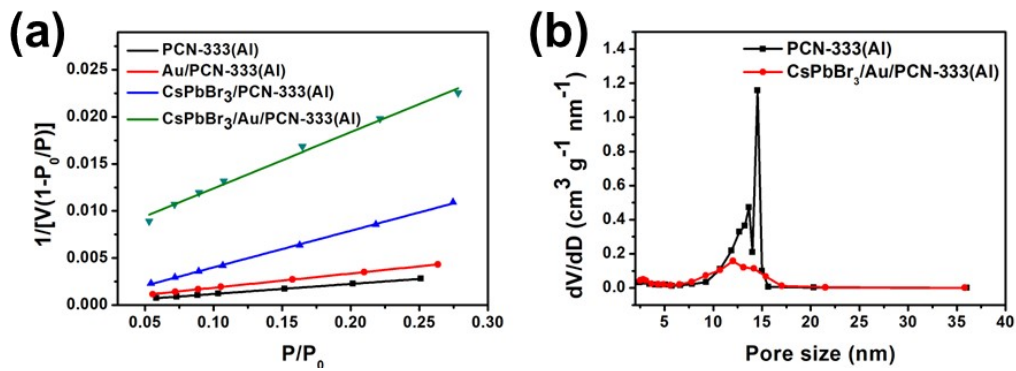

**Figure S6.** (a) The linear BET equation fitting results of different samples. (b) Comparison of DFT pore size distributions before and after encapsulating the Au and perovskite (obtained from N<sub>2</sub> sorption isotherm at 77 K and 1 atm).

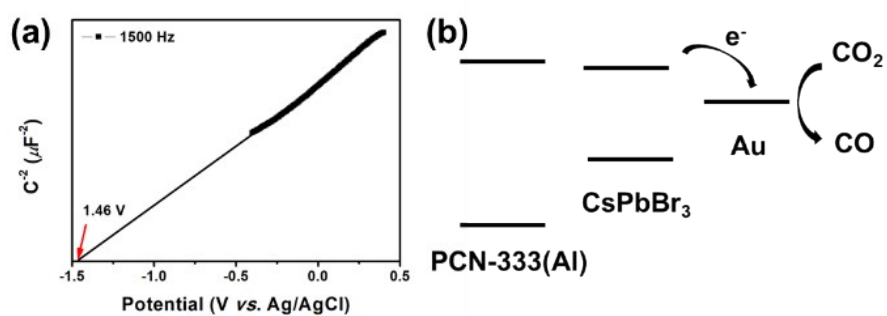

**Figure S7.** (a) Mott-Schottky plot of PCN-333(Al). (b) Schematic diagram of the relative energy band position of PCN-333(Al), CsPbBr<sub>3</sub> and Au.

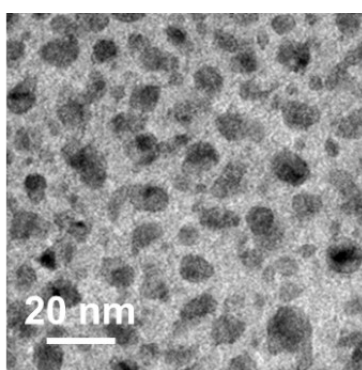

**Figure S8.** TEM image of CsPbBr<sub>3</sub> nanocrystals.

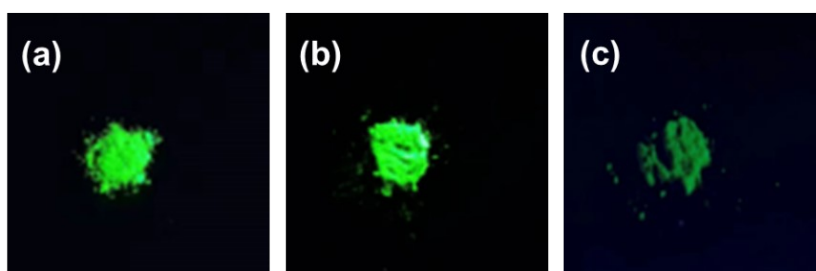

**Figure S9.** Photographs of samples excited at 365 nm: (a) CsPbBr<sub>3</sub> NCs, (b) CsPbBr<sub>3</sub>/PCN-333(Al); (c) CsPbBr<sub>3</sub>/Au/PCN-333(Al).

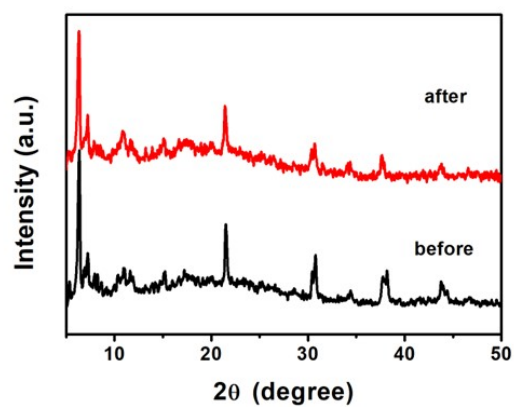

**Figure S10.** XRD pattern of CsPbBr<sub>3</sub>/Au/PCN-333(Al) after 5 photocatalytic cycles.

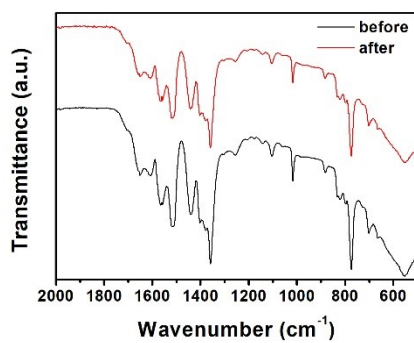

**Figure S11.** FTIR spectra of CsPbBr<sub>3</sub>/Au/PCN-333(Al) before and after 5 photocatalytic cycles.

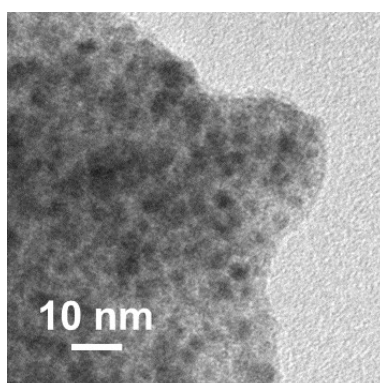

**Figure S12.** TEM image of CsPbBr<sub>3</sub>/Au/PCN-333(Al) after 5 photocatalytic cycles.

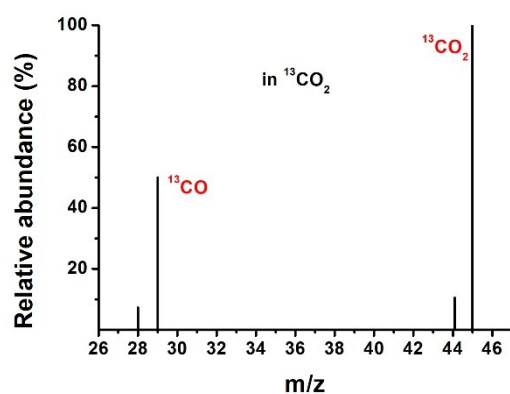

**Figure S13.** GC-MS spectra of isotope labeling catalytic products within  $^{13}\text{CO}_2$  atmosphere.

**Table S1.** The content of each component in the composite sample ICP-MS

| Sample                              | Au/wt% | CsPbBr <sub>3</sub> /wt% |
|-------------------------------------|--------|--------------------------|
| Au/PCN-333(Al)                      | 5.8    | -                        |
| CsPbBr <sub>3</sub> /PCN-333(Al)    | -      | 44.8                     |
| CsPbBr <sub>3</sub> /Au/PCN-333(Al) | 3.1    | 43.2                     |

**Table S2.** Fitted PL decay parameters of CsPbBr<sub>3</sub>, CsPbBr<sub>3</sub>/PCN-333(Al) and CsPbBr<sub>3</sub>/Au/PCN-333(Al).

| Sample                              | $\tau_1/\text{ns}$ | $A_1/\%$ | $\tau_2/\text{ns}$ | $A_2/\%$ | $\tau_{\text{average}}/\text{ns}$ |
|-------------------------------------|--------------------|----------|--------------------|----------|-----------------------------------|
| CsPbBr <sub>3</sub> NCs             | 6.63               | 44.38    | 69.97              | 55.62    | 41.86                             |
| CsPbBr <sub>3</sub> /PCN-333(Al)    | 6.15               | 44.48    | 52.61              | 55.52    | 31.94                             |
| CsPbBr <sub>3</sub> /Au/PCN-333(Al) | 0.44               | 65.74    | 16.06              | 34.26    | 5.79                              |

**Table S3.** Summary of photocatalytic performances of different catalysts after 3 h of reaction.

|                                                                         | Condition       | $Yield_{CO}$<br>/ $\mu\text{mol g}^{-1}$ | $Yield_{CH_4}$<br>/ $\mu\text{mol g}^{-1}$ | $R_{\text{electron}}^a$<br>/ $\mu\text{mol g}^{-1} \text{h}^{-1}$ |
|-------------------------------------------------------------------------|-----------------|------------------------------------------|--------------------------------------------|-------------------------------------------------------------------|
| No catalyst                                                             | CO <sub>2</sub> | -                                        | -                                          | -                                                                 |
| No light                                                                | CO <sub>2</sub> | -                                        | -                                          | -                                                                 |
| PCN-333(Al)                                                             | CO <sub>2</sub> | -                                        | -                                          | -                                                                 |
| Au/PCN-333(Al)                                                          | CO <sub>2</sub> | -                                        | -                                          | -                                                                 |
| CsPbBr <sub>3</sub> NCs                                                 | CO <sub>2</sub> | 7.41                                     | 2.22                                       | 10.83                                                             |
| CsPbBr <sub>3</sub> /PCN-333(Al)                                        | CO <sub>2</sub> | 28.65                                    | 6.48                                       | 36.38                                                             |
| CsPbBr <sub>3</sub> /Au/PCN-333(Al)-<br>low CsPbBr <sub>3</sub> loading | CO <sub>2</sub> | 101.85                                   | -                                          | 67.89                                                             |
| CsPbBr <sub>3</sub> /Au/PCN-333(Al)                                     | CO <sub>2</sub> | 186.15                                   | -                                          | 124.10                                                            |
|                                                                         | N <sub>2</sub>  | 8.49                                     | 0.17                                       | 6.12                                                              |

$$^a R_{\text{electron}} = [2Yield_{CO} + 8Yield_{CH_4}] / \text{Time}$$
